# Supplementary material for: Effect of Kinase Inhibiting RNase Attenuator (KIRA) Compounds on the Formation of Face-to-Face Dimers of Inositol-Requiring Enzyme 1: Insights from Computational Modeling
Source: Int J Mol Sci. 2019 Nov 6;20(22):5538. doi: 10.3390/ijms20225538 (PMC6887741; doi:10.3390/ijms20225538)
Supplement: Supplementary file 1 [file ijms-20-05538-s001.pdf]

## Effect of Kinase Inhibiting RNase Attenuator (KIRA) Compounds on the Formation of Face-to-Face Dimers of Inositol-Requiring Enzyme 1: Insights from Computational Modeling

Antonio Carlesso <sup>1</sup>, Chetan Chintha <sup>2</sup>, Adrienne M. Gorman <sup>2</sup>, Afshin Samali <sup>2</sup> and Leif A. Eriksson <sup>1,\*</sup>

<sup>1</sup> Department of Chemistry and Molecular Biology, University of Gothenburg, 405 30 Göteborg, Sweden;

<sup>2</sup> Apoptosis Research Centre, National University of Ireland Galway, H91 TK33, Galway, Ireland

\* Correspondence: leif.eriksson@chem.gu.se; Tel.: +46 317869117

**Table S1.** RMSD<sup>a</sup> for the 5 top-scored docked poses generated using five different protein–protein docking approaches to reproduce the known IRE1 dimer complexes.

|                  | Face-to-face dimer<br>(PDB code: 3P23 ) | Back-to-back<br>dimer (PDB code: 4YZC) |
|------------------|-----------------------------------------|----------------------------------------|
| <b>SwarmDock</b> | 1.39, 27.47, 12.94, 16.43, 1,42         | 3.56, 31.58, 23.99, 20.23, 34.32       |
| <b>ZDOCK</b>     | 12.48, 14.59, 0.97, 16.24, 3.65         | 3.32, 23.70, 31.57, 33.97, 13.34       |
| <b>HsymDock</b>  | 3.12, 33.20, 39.72, 38.63, 33.62        | 13.25, 12.84, 30.68, 28.96, 35.72      |
| <b>PatchDock</b> | 24.33, 30.03, 25.45, 28.00, 32,59       | 29.49, 21.59, 28.19, 25.35, 21.79      |
| <b>ClusPro</b>   | 3.58, 11.91, 22.40, 17.65, 29.22        | 31.01, 33.02, 30.02, 34.60, 30.10      |

<sup>a</sup>Root-mean-square deviation (RMSD) is calculated for C $\alpha$  atoms by superimposing the five top-scored docked poses generated by the programs, with the crystallographic structures.

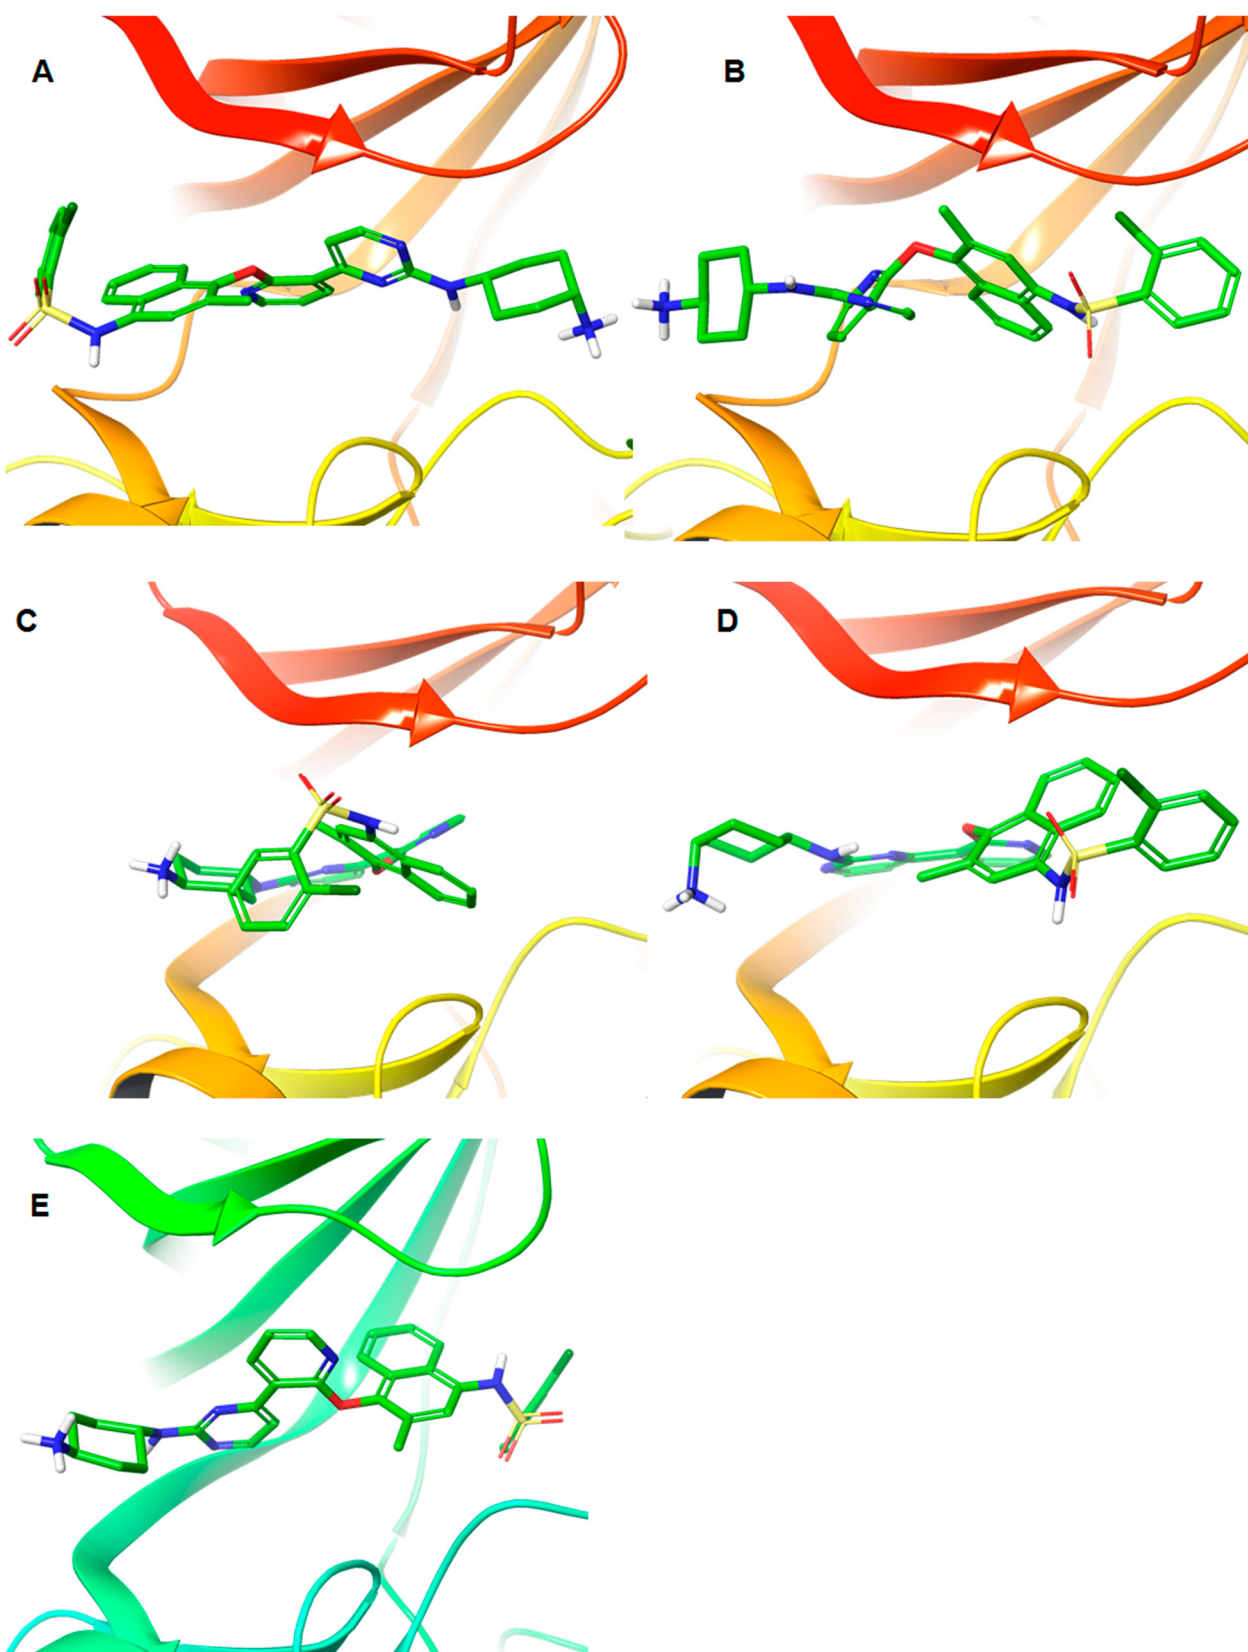

**Figure S1.** Representation of the KIRA docking pose in (A) Chain A of 3P23 PDB code, (B) Chain B of 3P23 PDB code, (C) Chain A of 4YZC PDB code, (D) Chain B of 4YZC PDB code. The crystallographic pose of KIRA in the 4U6R PDB structure is shown in panel E.

A

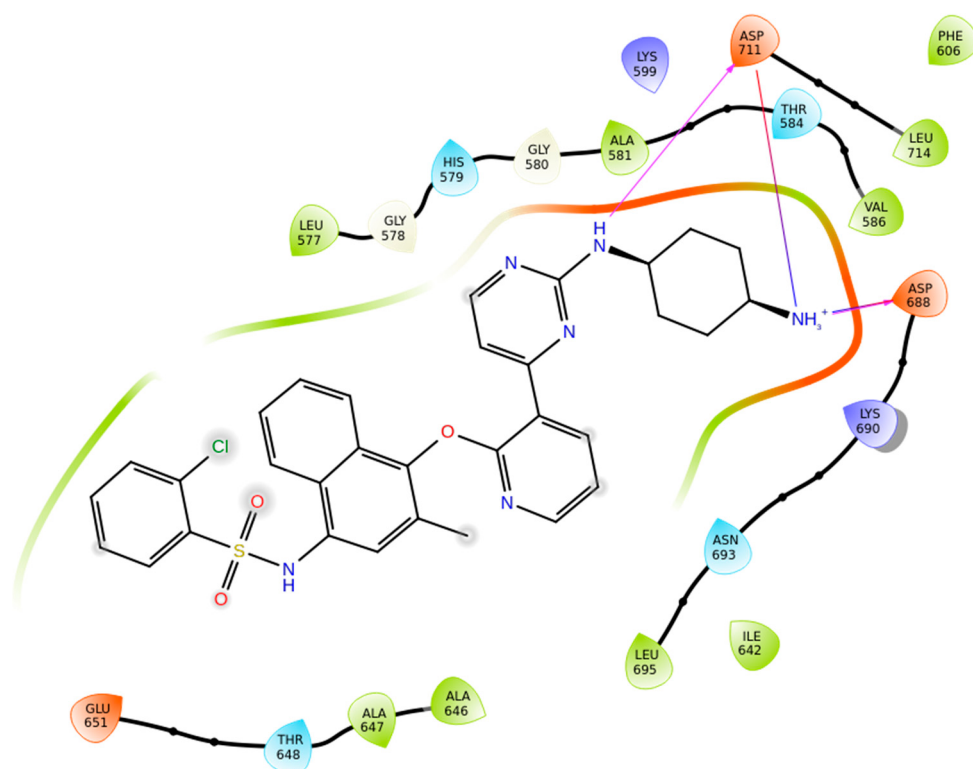

B

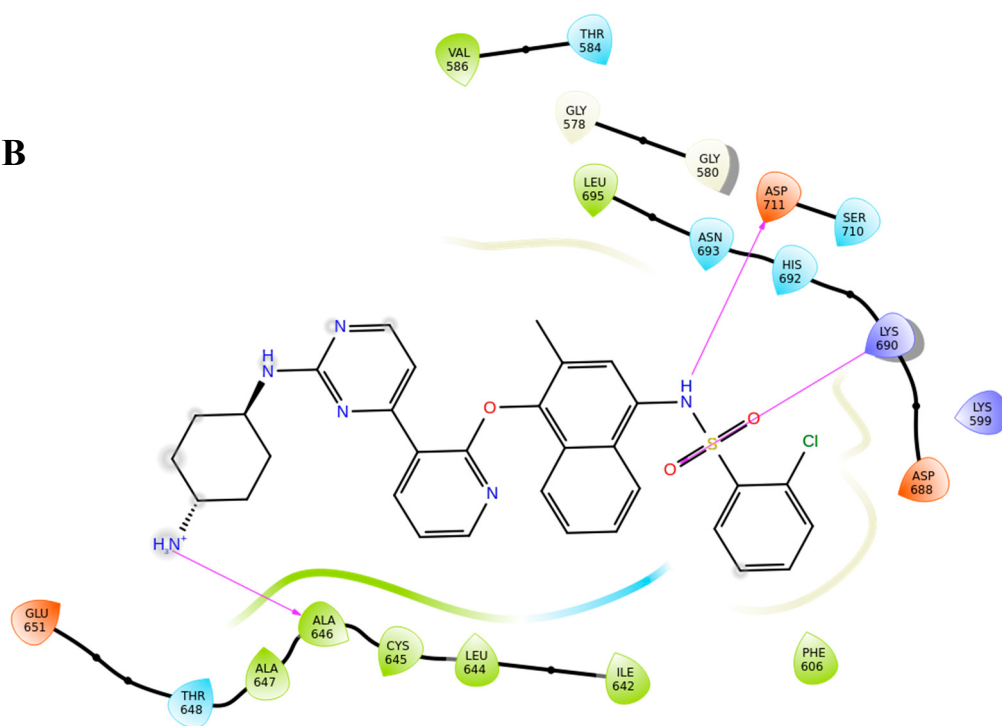

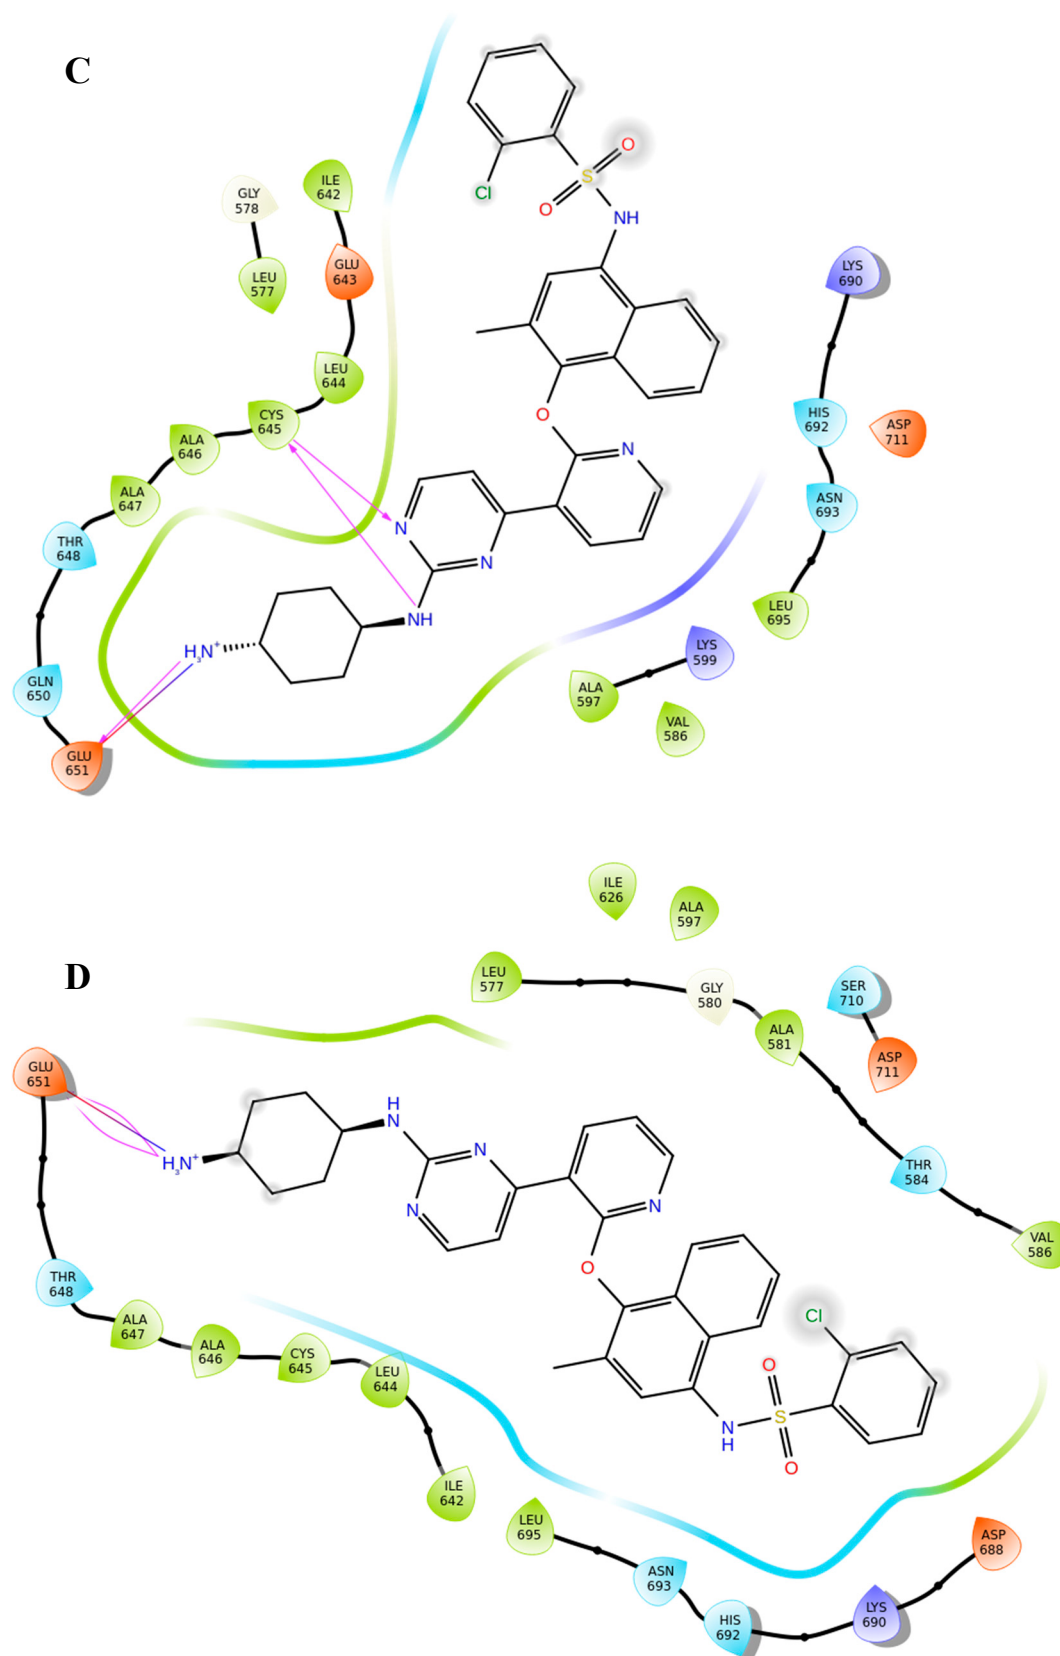

**Figure S2.** 2D representation diagrams of the KIRA binding modes in (A) Chain A of 3P23 PDB code, (B) Chain B of 3P23 PDB code, (C) Chain A of 4YZC PDB code, and (D) Chain B of 4YZC PDB code. Interactions between the IRE1 residues and the ligand are drawn as lines, colored by interaction type. Arrows indicate H-bonds, with the direction from donor to acceptor.

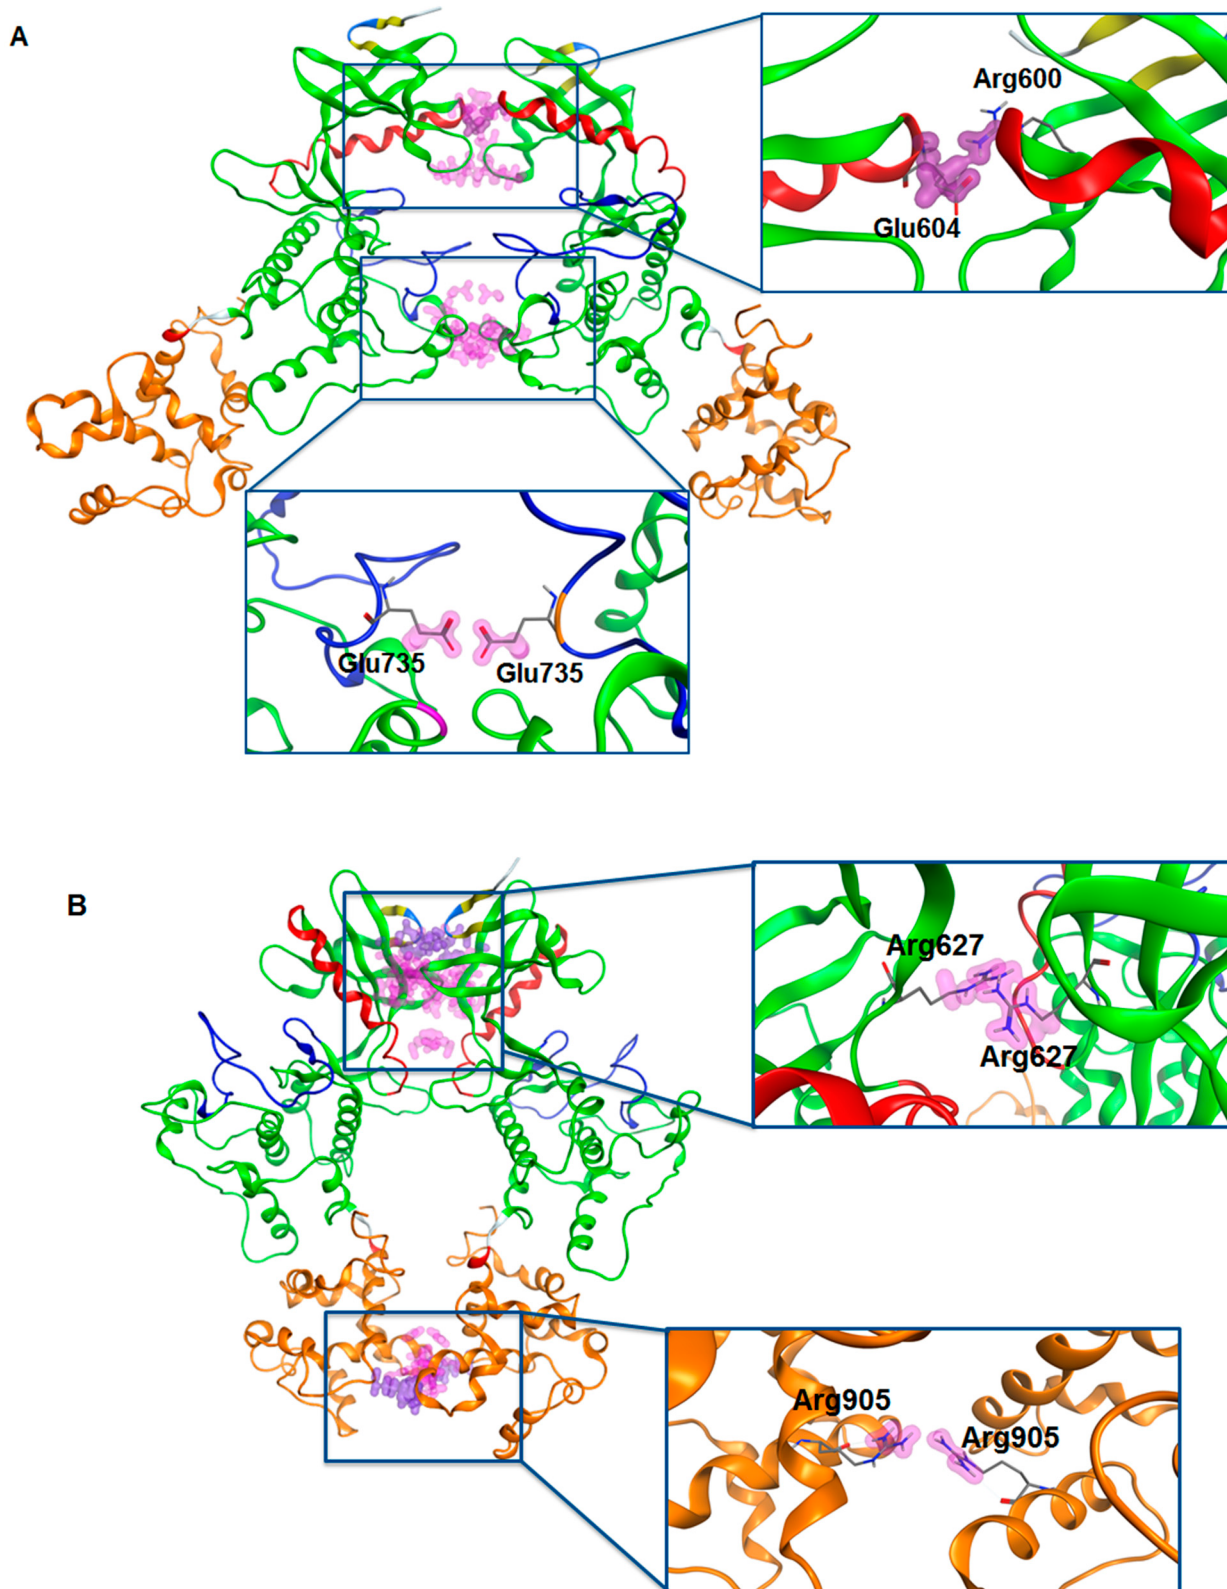

**Figure S3.** Ribbon diagram representing the structure of the KIRA-bound dimer forms obtained by superposition of the monomer of the 4U6R PDB structure on each monomer of the native crystallographic structures of the IRE1 in (A) face-to-face (PDB 3P23) and (B) back-to-back (PDB code: 4YZC) dimers. The kinase domain is shown in green (residues 571-832), the helix-αC in red (residues 603-623), the activation segment in blue (residues: 711-741), the RNase domain in orange (residues 837-963). The yellow segment represents the β-strand and the cyan the H-bonded turn that are not part of the kinase or RNase domain. Violet spheres = steric clashes.

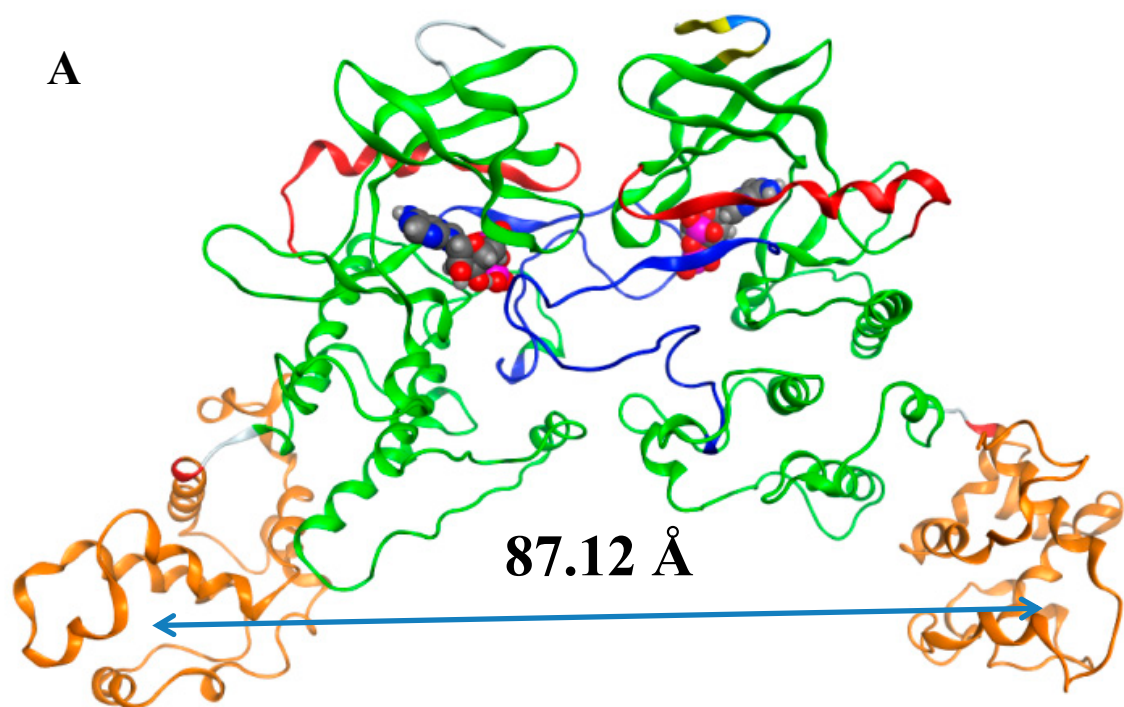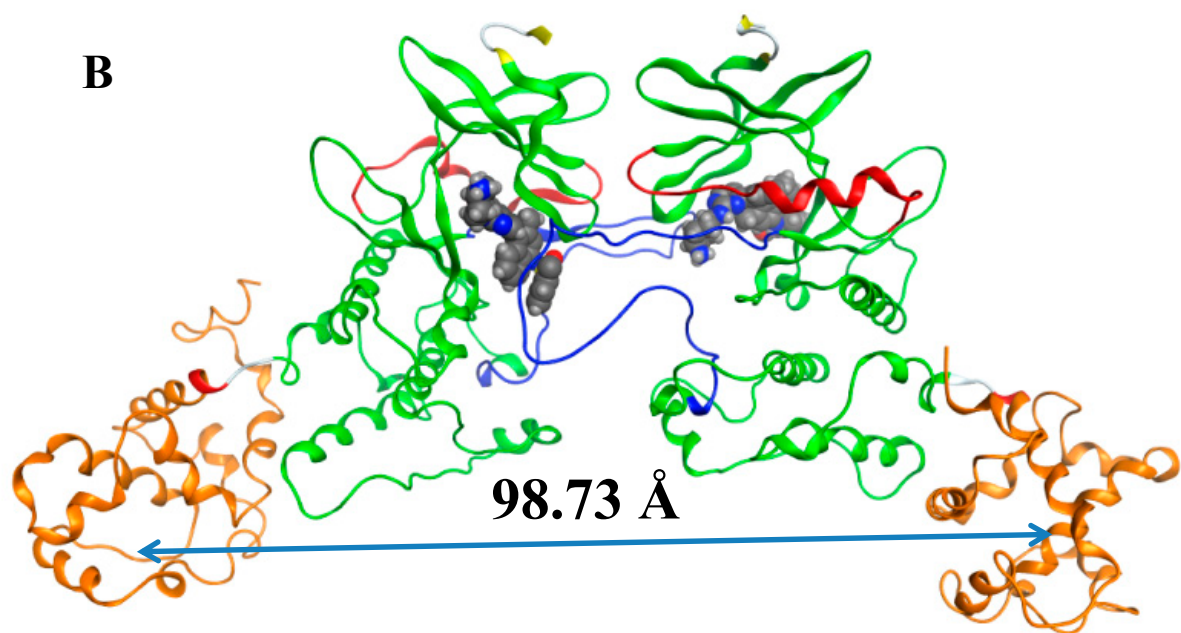

C

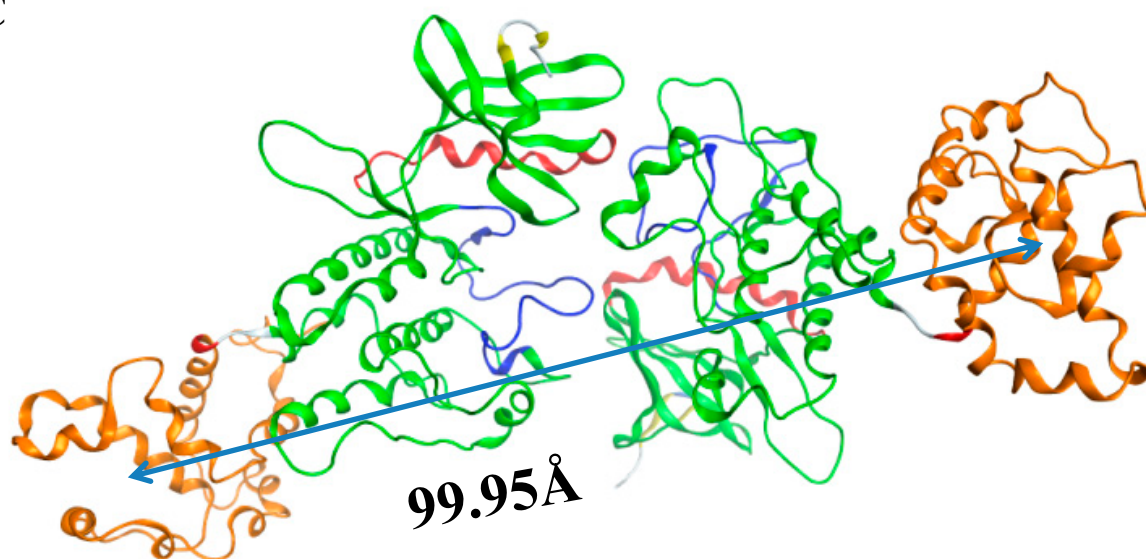

**Figure S4.** Comparison of the (A) native face-to-face crystal dimer structure (PDB code: 3P23) (point 'a' in Panel D of Figure 5), with the higher interface RMSD frame identified from three independent MD replicas for (B) KIRA docked in PDB 3P23 dimer (point 'b' in Panel E of Figure 5) and (C) protein-protein docked pose of PDB 4U6R in face-to-face dimer (point 'c' in Panel F of Figure 5). The distance between the RNase domain Center of Mass (COM) of dimer is shown. The kinase domain is shown in green (residues 571-832), the helix- $\alpha$ C in red (residues 603-623), the activation segment in blue (residues: 711-741), the RNase domain in orange (residues 837-963). The yellow segment represents the  $\beta$ -strand and the cyan the H-bonded turn that are not part of the kinase or RNase domain. ADP (A) and KIRA (B) highlighted in space-filling model to indicate the kinase binding site.

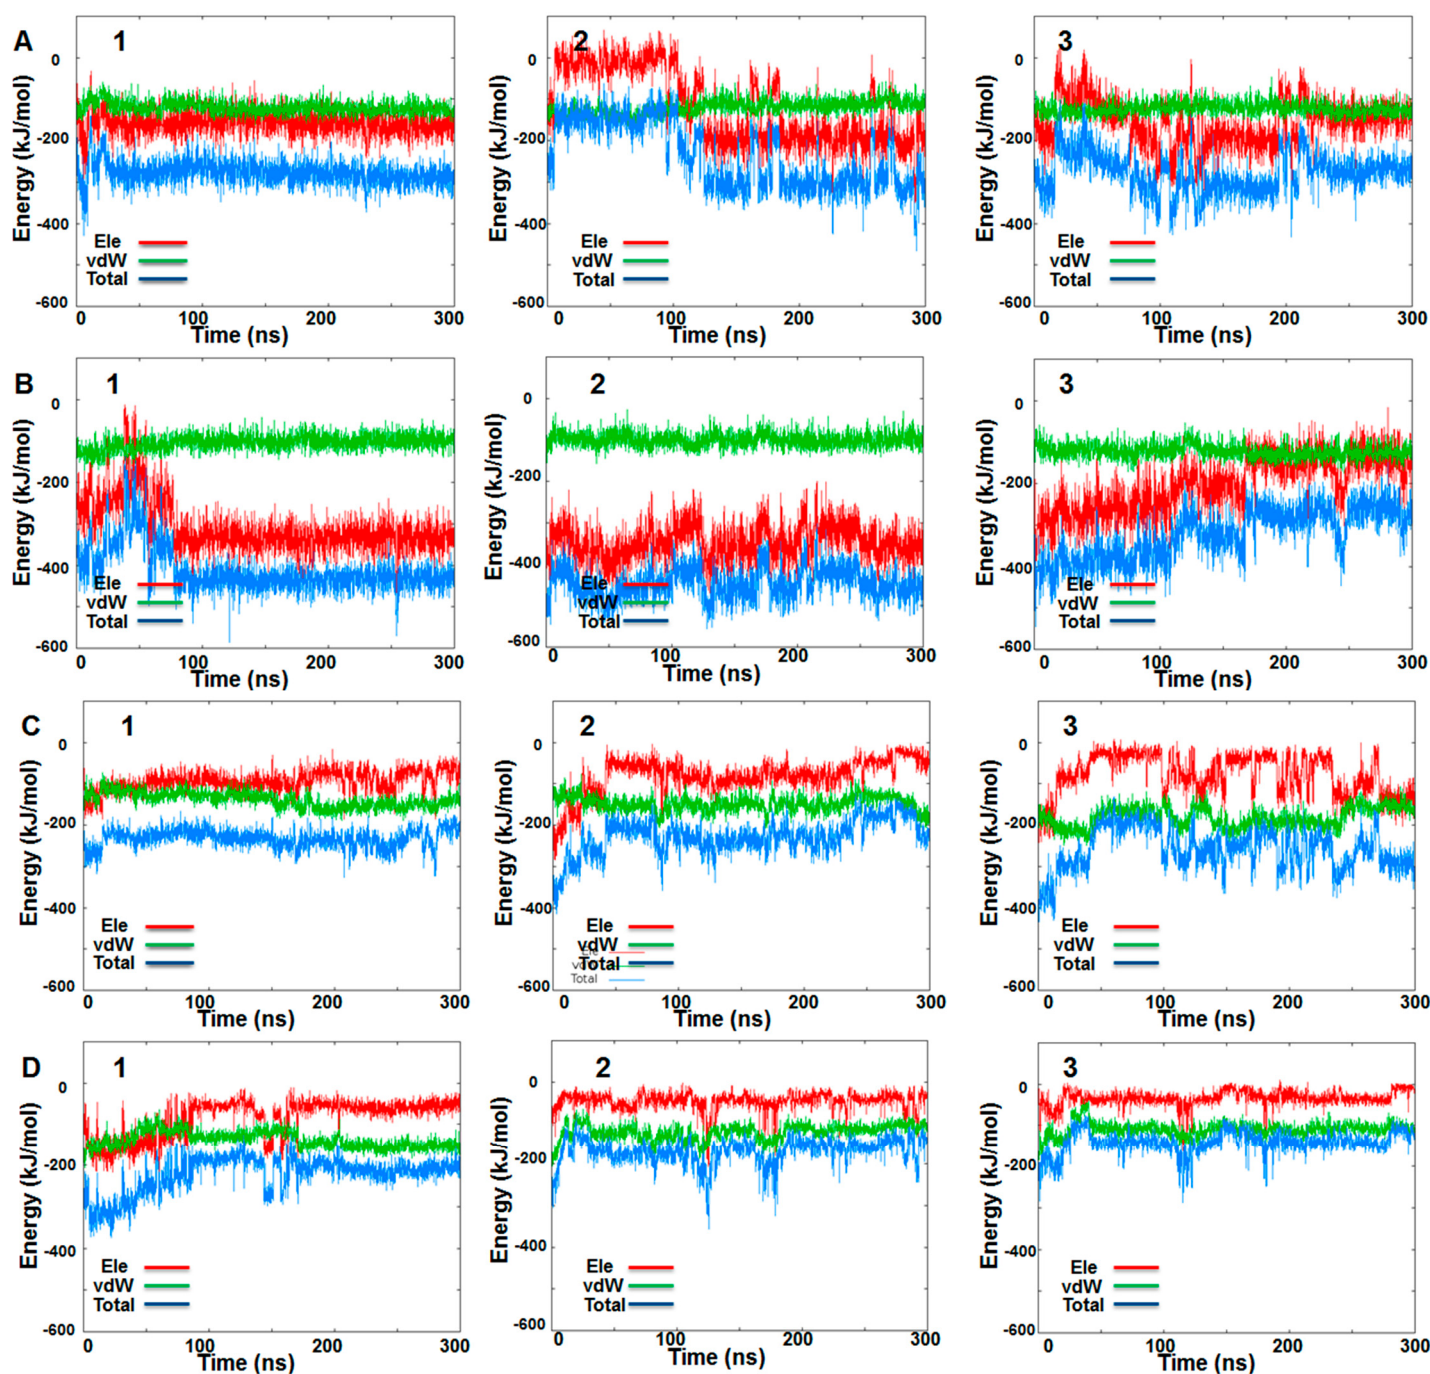

**Figure S5.** IRE1 face-to-face dimer MD simulations. Time-resolved interaction energy profiles for ADP during the three MD simulation replicas of the native face-to-face crystal dimer (PDB code: 3P23): (A) Chain A, (B) Chain B. Time-resolved interaction energy profiles during the three MD simulation replicas for KIRA docked in the native face-to-face crystal dimer (PDB code: 3P23): (C) Chain A and (D) Chain B.

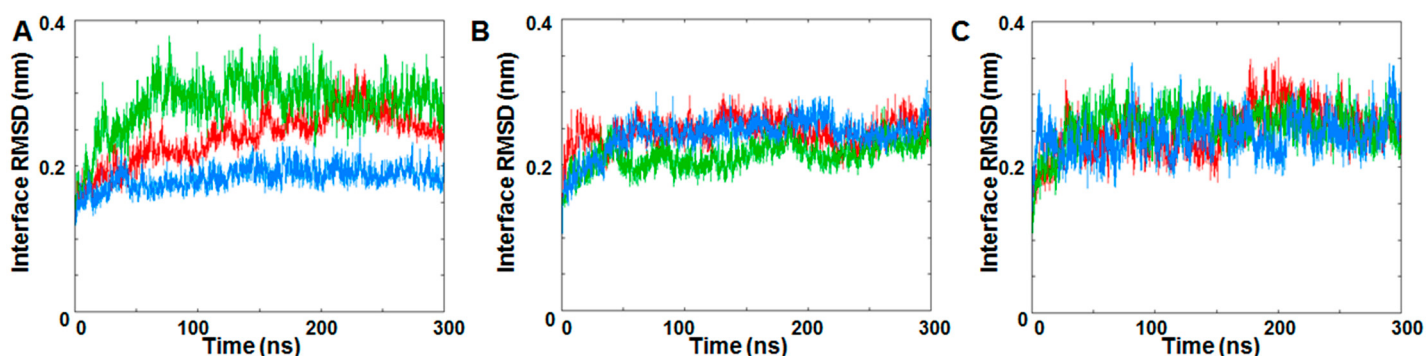

**Figure S6.** Interface RMSDs of IRE1 back-to-back dimer C $\alpha$  atoms during the three MD simulation replicas of (A) native back-to-back crystal dimer structure (PDB code: 4YZC), (B) KIRA docked in PDB 4YZC dimer, and (C) protein-protein docked pose of PDB 4U6R in back-to-back dimer form. Replicates 1, 2, and 3 are represented in red, green and blue, respectively. .

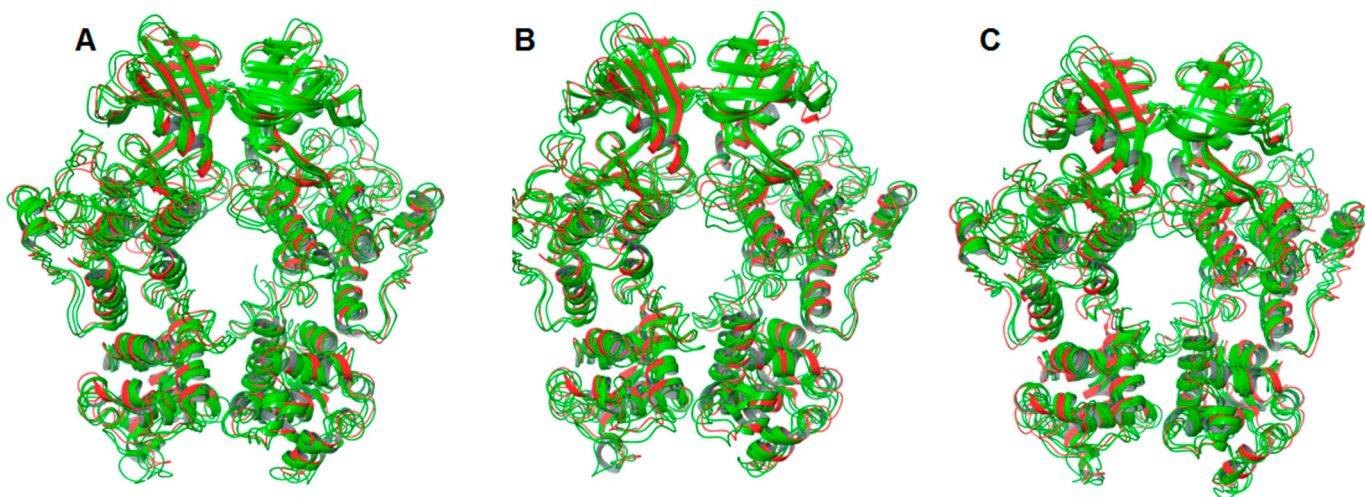

**Figure S7.** Superposition of the last frame of each individual MD simulation (green) of (A) native back-to-back dimer from crystal structure (PDB code: 4YZC), (B) KIRA docked in PDB 4YZC structure and (C) protein-protein docked pose of PDB 4U6R in back-to-back dimer, onto the native back-to-back crystallographic structure (PDB code: 4YZC) (red).

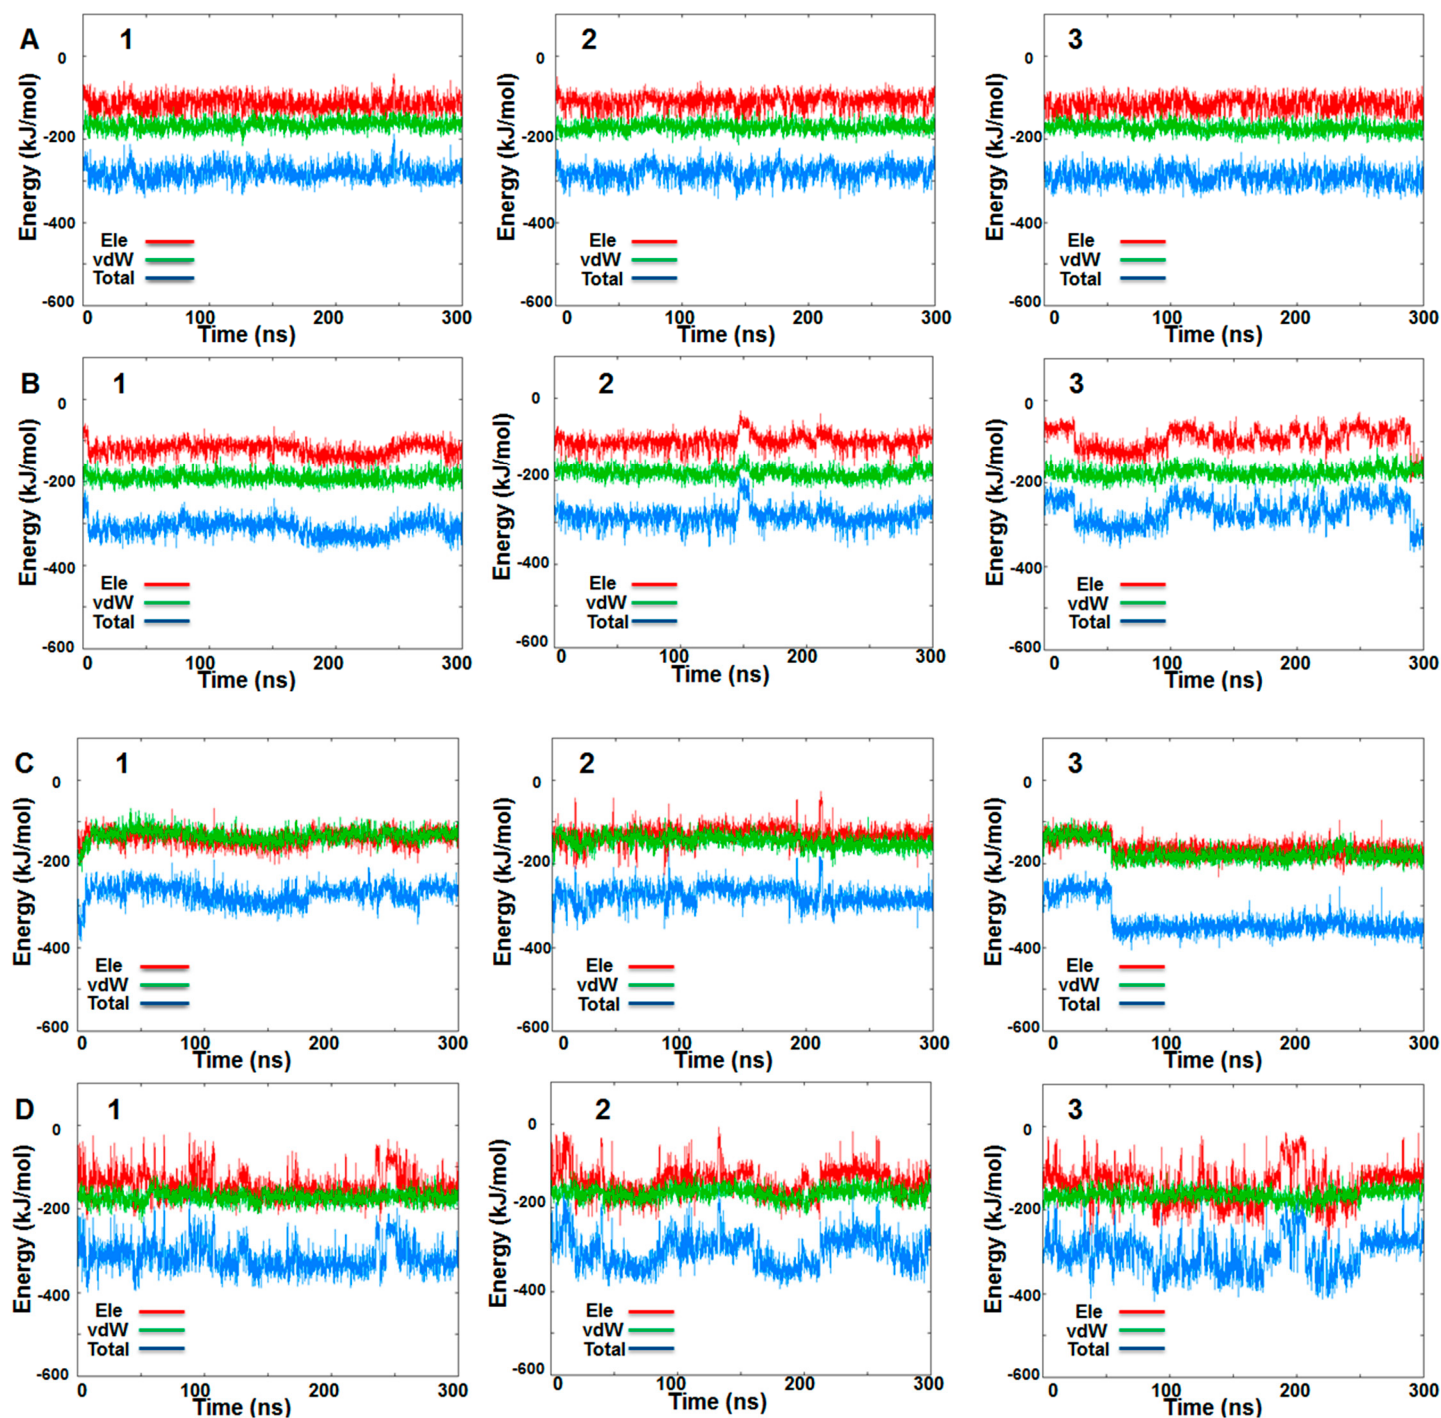

**Figure S8.** IRE1 back-to-back dimer MD simulations. Time-resolved interaction energy profiles for staurosporine during the three MD simulation replicas of the native back-to-back crystal dimer (PDB code: 4YZC): (A) Chain A, (B) Chain B. Time-resolved interaction energy profiles during the three MD simulation replicas for KIRA docked in the native back-to-back crystal dimer (PDB code: 4YZC): (C) Chain A and (D) Chain B.
